# Supplementary material for: Functional stapled fragments of human preptin of minimised length
Source: Royal Society of Chemistry journal article supplement (doi:10.1039/d1ob02193a), 2022-01-01
Supplement: d1ob02193a1.pdf [file d1ob02193a1.pdf]

*Electronic Supplementary Material (ESI)*

**Functional stapled fragments of human preptin of the minimized length**

Marta Lubos,<sup>a</sup> Lucie Mrázková,<sup>a</sup> Petra Gwozdiaková,<sup>a</sup> Jan Pícha,<sup>a</sup> Miloš Buděšínský,<sup>a</sup> Jiří Jiráček,<sup>a</sup> Jakub Kaminský,<sup>a,\*</sup> Lenka Žáková<sup>a,\*</sup>

*Institute of Organic Chemistry and Biochemistry of the CAS, Flemingovo nám. 2, 166 10 Prague, Czech Republic.*

Table of Contents:

Page S2-S3:

Scheme S1. Structures of preptin fragments **1-6**.

Pages S4:

Figure S1. Tested staples within the computational design.

Table S1. The helical content in all considered stapled peptides.

Pages S5:

Scheme S2. Synthetic scheme for preparation of stapled peptides **4-6** by RCM.

Scheme S3. Synthetic scheme for preparation of stapled peptide **3** by the click reaction.

Pages S6:

Table S2. The helical content in studied peptides.

Pages S7:

Figure S2. Analytical RP-HPLC profile of purified peptides **1-6**.

Pages S8

Figure S3. HR-MS of human preptin.

Pages S9-S10:

Figures S4-S9. HR-MS peptides **1-6**.

Pages S11-S12:

Tables S3-S8. Proton chemical shifts of peptides **1-6**.

Pages S13-S18:

Figures S10-S15. The secondary structure content over the time of peptides **1-6**.

Pages S19-S21:

Figures S16-S18. NMR spectrum of peptides **4-6**.

Page S22:

Figure S19. Binding curves of IGF2 and preptin on D11-IGF2R.

Page S23.

Figure S20. Secondary structure content (%) for fragments and human preptin.

Page S24.

Figure S21. Intramolecular H-bonds.

Page S25.

Figure S22. Average deviations of backbone atoms of peptide **4** and peptide **5**.

Page S26.

Figure S23. Hydrophobic and hydrophilic surfaces for selected peptides.

Page S27.

Table S9. Experimental absorption and CD band wavelengths  $\lambda$  (nm) and intensities ( $\Delta\epsilon$ ).



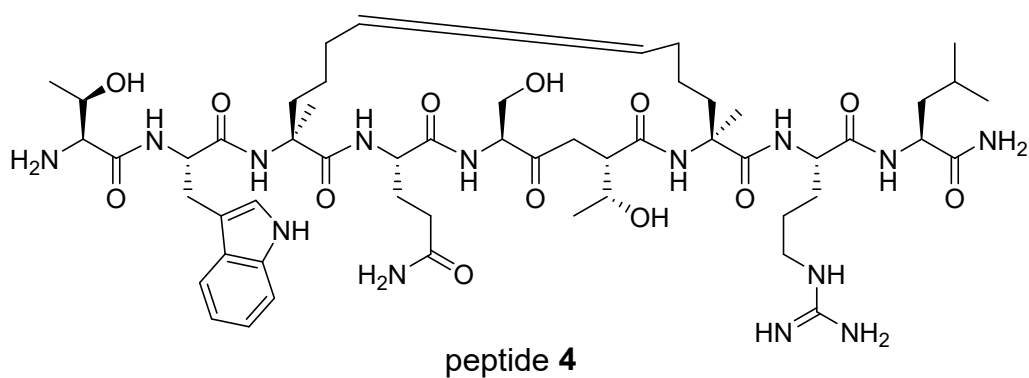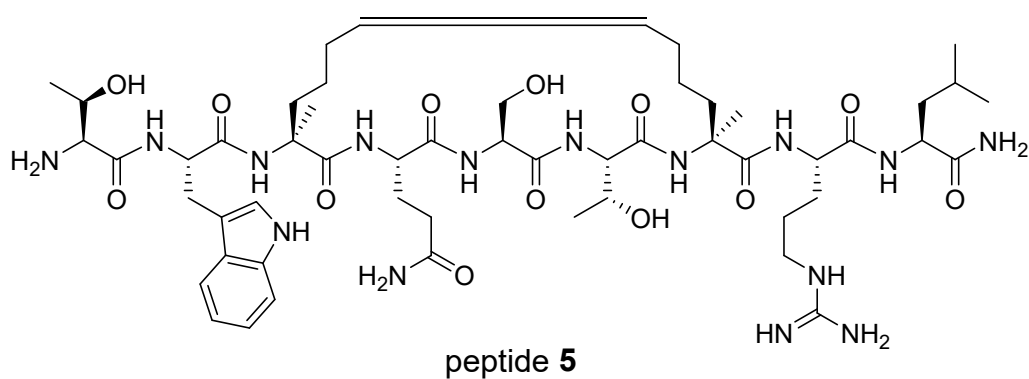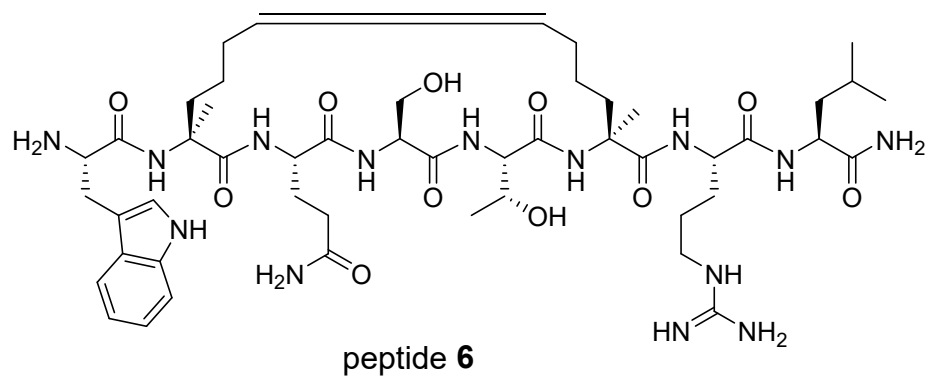

**Scheme S1.** Studied preptin fragments (peptides 1 and 2) and their stapled derivatives (peptides 3-6).

## Triazole ring staples

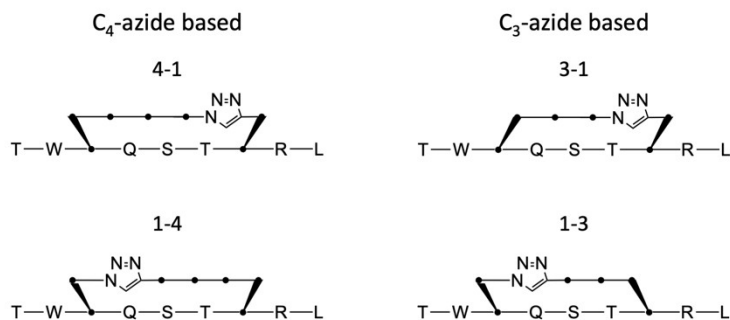

## Olefine staples

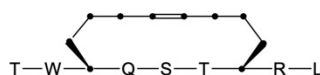

**Figure S1.** Tested links within the computational design of stapled peptides. We considered only the (*S*, *S*) configurations on both amino acids connected by the triazole or the olefine staple (3 and 7).

**Table S1.** The helical content (in %) in all considered stapled peptides from Figure S1 during 100 ns long MD simulations. All simulations started from ideal  $\alpha$ -helical conformations ( $\phi=-52^\circ$ ,  $\psi=-53^\circ$ )

| C <sub>3</sub> azide based |      | C <sub>4</sub> azide based |      |
|----------------------------|------|----------------------------|------|
| 1-3                        | 3 %  | 1-4                        | 22 % |
| 3-1                        | 15 % | 4-1                        | 22 % |

Electronic Supplementary Material (ESI)

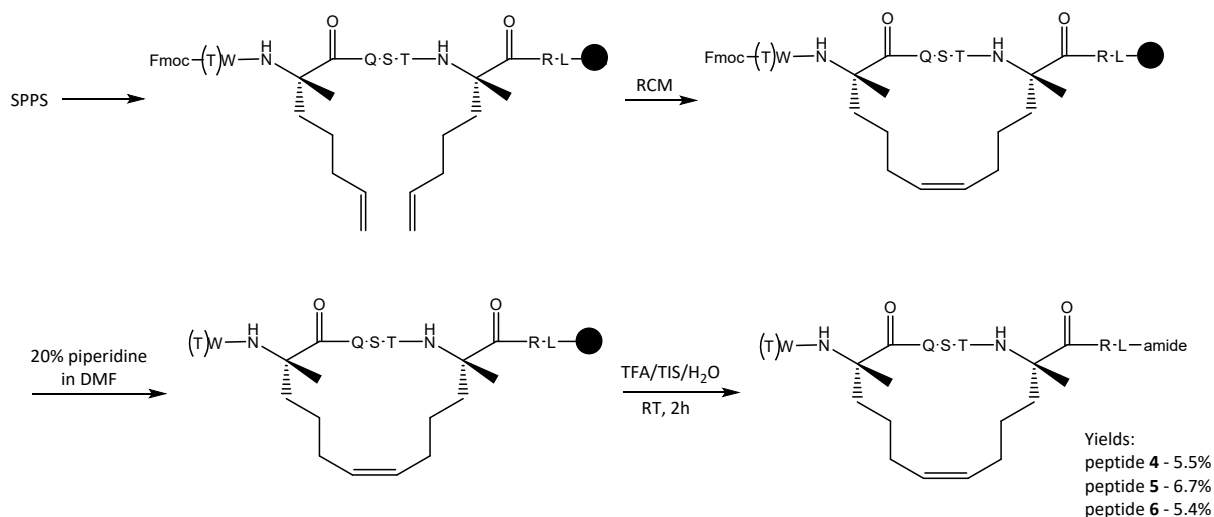

**Scheme S2.** Synthetic scheme for the preparation of stapled peptides **4-6** by a ring-closing olefin metathesis reaction (RCM). Peptide **6** does not contain N-terminal threonine. SPPS means solid phase peptide synthesis. Amino acids are shown in single letter codes (T, W, Q, S, R and L). Black dot is Rink Amide resin. Amide means C-terminal carboxamide. Configuration (S) of C $\alpha$  atoms of non-standard amino acids is also shown.

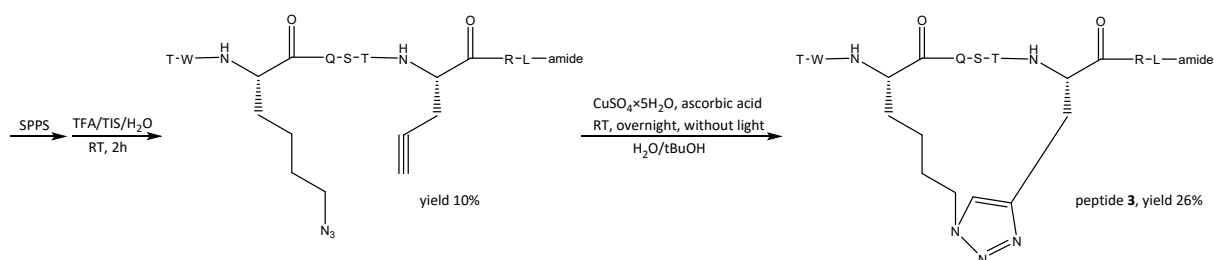

**Scheme S3.** Synthetic scheme for the preparation of stapled peptide **3** by a Cu<sup>(I)</sup> catalysed cycloaddition of alkyne and azide. SPPS means solid phase peptide synthesis. Amino acids are shown in single letter codes (T, W, Q, S, R and L). Amide means C-terminal carboxamide. Configuration (S) of C $\alpha$  atoms of non-standard amino acids is also shown.

*Electronic Supplementary Material (ESI)*

**Table S2.** The helical content (in %) in studied peptides as provided by MD simulations or CD spectroscopy.

| <b>% helix</b> | <b>10 ns MD</b> | <b>100 ns MD</b> | <b>from CD</b> |
|----------------|-----------------|------------------|----------------|
| peptide 1      | 8               | 7                | 0              |
| peptide 2      | 6               | 0                | 0              |
| peptide 3      | 45              | 22               | 9              |
| peptide 4      | 18              | 7                | 0              |
| peptide 5      | 44              | 11               | 8              |
| peptide 6      | 17              | 8                | 0              |

Electronic Supplementary Material (ESI)

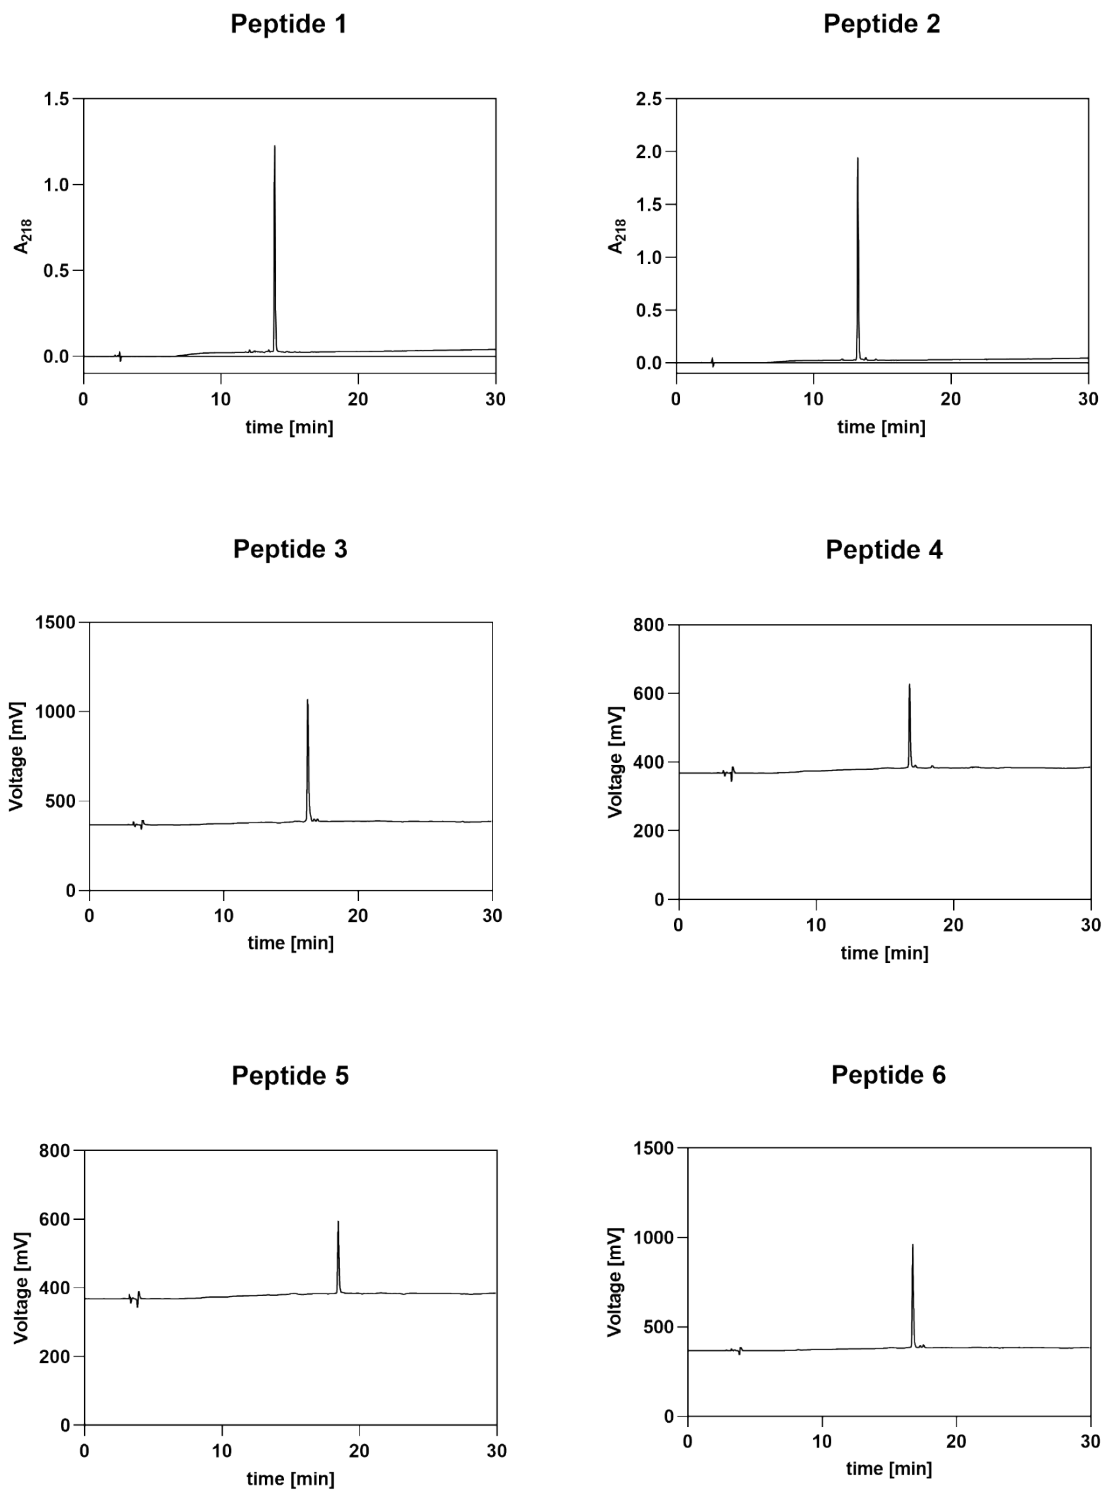

Figure S2. Analytical RP-HPLC profile of purified peptides 1-6.

## Electronic Supplementary Material (ESI)

300721\_servisHR\_11\_XT\_00001\_M\_#2 RT: 2.00 AV: 1 SB: 2 1.00 , 1.00 NL: 1.64E6  
T: FTMS + p ESI Full ms [400.00-2000.00]

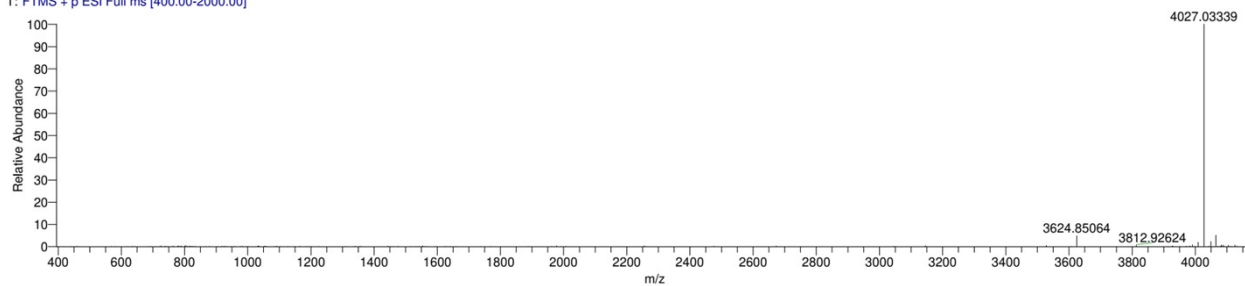

**Figure S3.** HR-MS of human preptin.



## Electronic Supplementary Material (ESI)

061221\_servisHR\_40\_XT\_00001\_M\_#1 RT: 1.00 AV: 1 NL: 2.91E6  
T: FTMS + p ESI Full ms [200.00-2000.00]

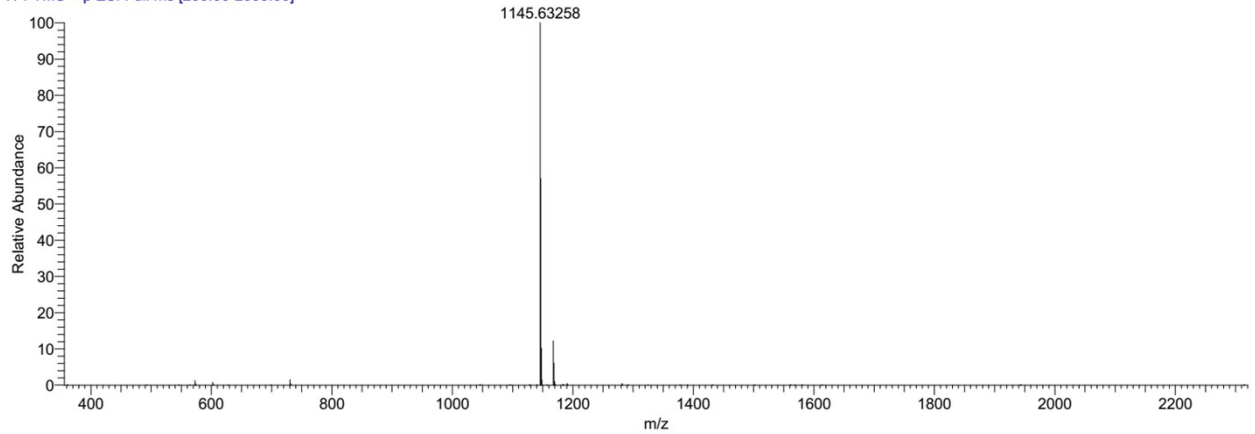

**Figure S4.** HR-MS of peptide 1.

061221\_servisHR\_27\_211206124736\_XT\_00001\_M\_#1 RT: 1.00 AV: 1 NL: 3.91E5  
T: FTMS + p ESI Full ms [200.00-2000.00]

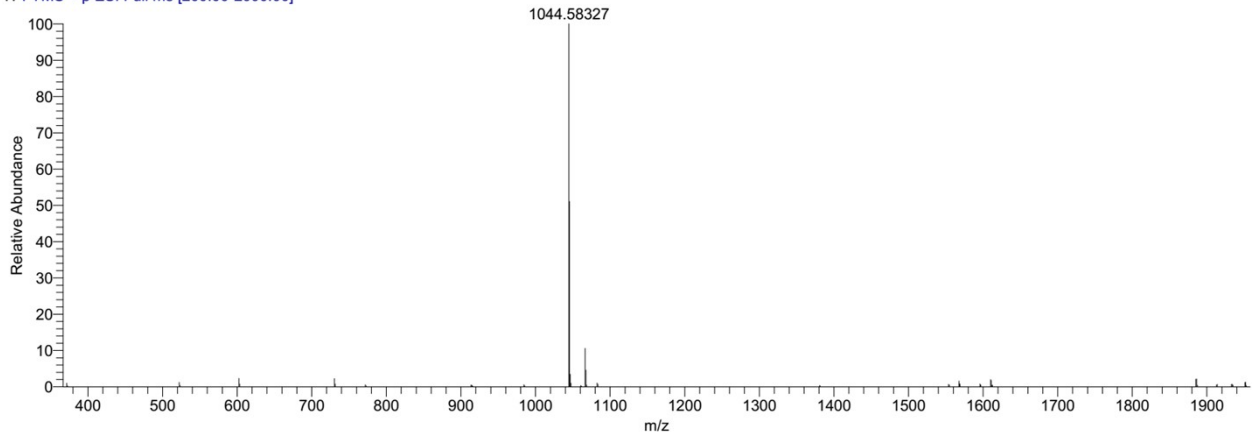

**Figure S5.** HR-MS of peptide 2.

141220\_servisHR\_+14\_XT\_00001\_M\_#2 RT: 2.00 AV: 1 SB: 2 1.00, 1.00 NL: 7.99E7  
T: FTMS + p ESI Full ms [200.00-2000.00]

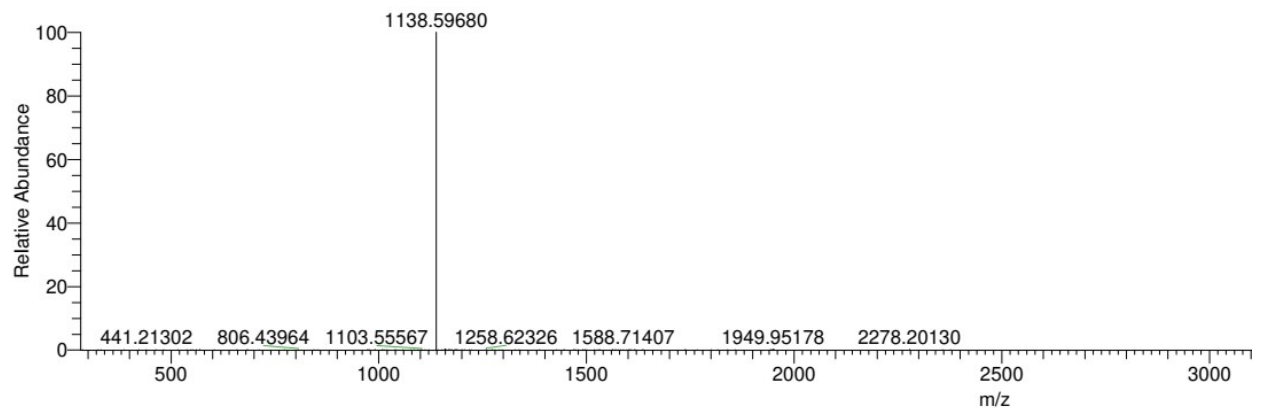

**Figure S6.** HR-MS of peptide 3.

## Electronic Supplementary Material (ESI)

141220\_servisHR\_+12\_XT\_00001\_M\_#2 RT: 2.00 AV: 1 SB: 2 1.00, 1.00 NL: 1.71E8  
T: FTMS + p ESI Full ms [200.00-2000.00]

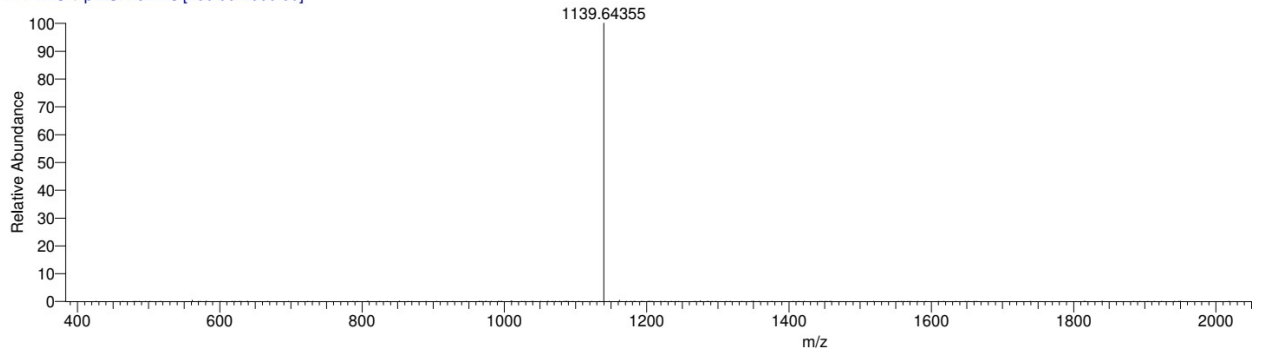

**Figure S7.** HR-MS of peptide 4.

141220\_servisHR\_+13\_XT\_00001\_M\_#2 RT: 2.00 AV: 1 SB: 2 1.00, 1.00 NL: 6.29E7  
T: FTMS + p ESI Full ms [200.00-2000.00]

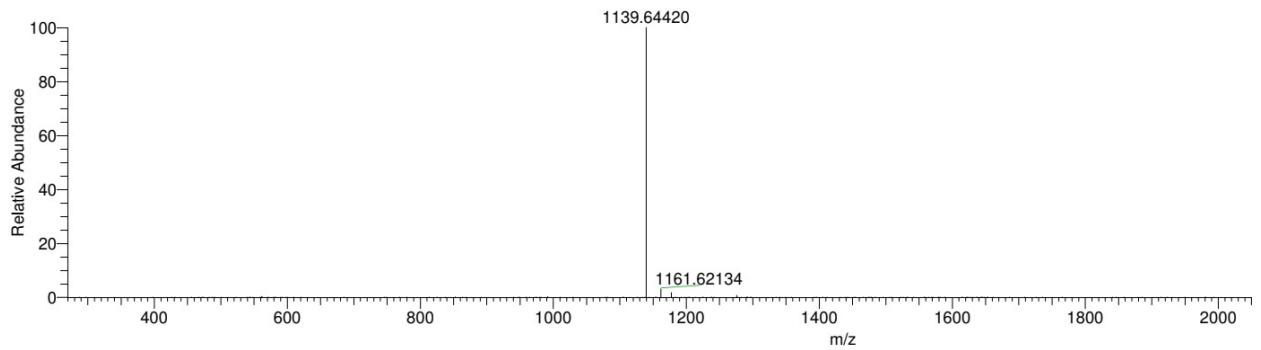

**Figure S8.** HR-MS of peptide 5.

141220\_servisHR\_+11\_XT\_00001\_M\_#2 RT: 2.00 AV: 1 NL: 3.14E7  
T: FTMS + p ESI Full ms [200.00-2000.00]

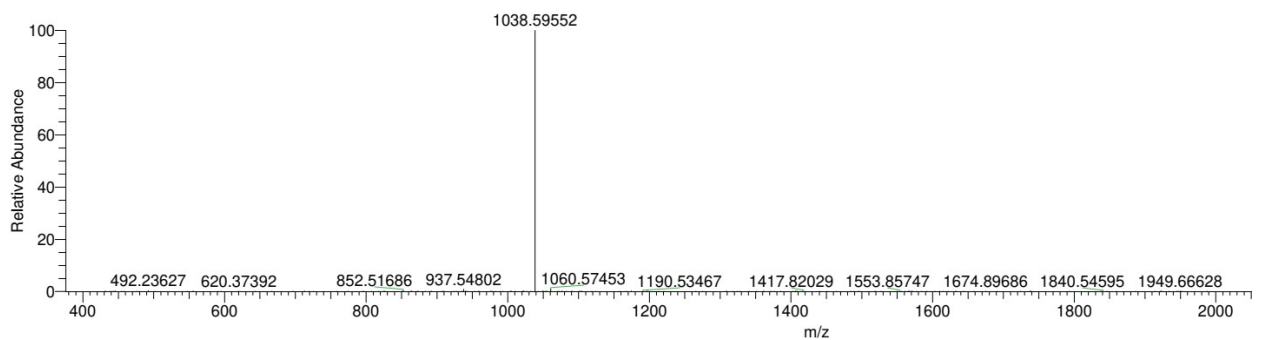

**Figure S9.** HR-MS of peptide 6.

*Electronic Supplementary Material (ESI)*

**Table S3.** Proton chemical shifts of peptide **1** (at 600 MHz; in H<sub>2</sub>O + D<sub>2</sub>O 95:5 + CD<sub>3</sub>COOD; pH=3.0; T = 25 deg).

| Residue | NH       | H $\alpha$ | H $\beta$  | H $\gamma$ | Others                                                                    |
|---------|----------|------------|------------|------------|---------------------------------------------------------------------------|
| Thr-1   | <i>a</i> | 3.89       | 4.16       | 1.29       |                                                                           |
| Trp-2   | 8.76     | 4.70       | 3.28; 3.25 |            | 10.11 (N1H), 7.27 (H2), 7.60 (H4), 7.23 (H5), 7.14 (H6), 7.48 (H7)        |
| Lys-3   | 8.03     | 4.13       | 1.67       | 1.22       | 1.56 (H $\delta$ ), 2.91 (H $\epsilon$ )                                  |
| Gln-4   | 8.14     | 4.15       | 2.02; 1.64 | 2.32       | 7.50; 6.87 (N $\epsilon$ H <sub>2</sub> )                                 |
| Ser-5   | 8.39     | 4.47       | 3.92; 3.86 |            |                                                                           |
| Thr-6   | 8.17     | 4.33       | 4.25       | 1.19       |                                                                           |
| Gln-7   | 8.30     | 4.31       | 2.07; 1.97 | 2.34       | 7.50; 6.84 (N $\epsilon$ H <sub>2</sub> )                                 |
| Arg-8   | 8.37     | 4.32       | 1.83; 1.75 | 1.61       | 3.18 (H $\delta$ ), 7.17 (N $\epsilon$ H)                                 |
| Leu-9   | 8.25     | 4.33       | 1.67       | 1.61       | 0.92 (H $\delta$ 1), 0.86 (H $\delta$ 2), 7.59; 7.04 (CONH <sub>2</sub> ) |

<sup>a</sup> not detected (fast exchange with water).

**Table S4.** Proton chemical shifts of peptide **2** (at 600 MHz; in H<sub>2</sub>O + D<sub>2</sub>O 95:5 + CD<sub>3</sub>COOD; pH=3.0; T = 25 deg).

| Residue | NH       | H $\alpha$ | H $\beta$  | H $\gamma$ | Others                                                                    |
|---------|----------|------------|------------|------------|---------------------------------------------------------------------------|
| Trp-1   | <i>a</i> | 4.31       | 3.40; 3.35 |            | 10.21 (N1H), 7.29 (H2), 7.57 (H4), 7.25 (H5), 7.14 (H6), 7.50 (H7)        |
| Lys-2   | 8.32     | 4.24       | 1.72       | 1.31       | 1.64 (H $\delta$ ), 2.95 (H $\epsilon$ )                                  |
| Gln-3   | 8.37     | 4.20       | 2.04; 1.97 | 2.36       | 7.51; 6.88 (N $\epsilon$ H <sub>2</sub> )                                 |
| Ser-4   | 8.48     | 4.50       | 3.93; 3.86 |            |                                                                           |
| Thr-5   | 8.21     | 4.34       | 4.25       | 1.20       |                                                                           |
| Gln-6   | 8.33     | 4.32       | 2.06; 1.97 | 2.33       | 7.51; 6.85 (N $\epsilon$ H <sub>2</sub> )                                 |
| Arg-7   | 8.39     | 4.32       | 1.82; 1.75 | 1.61       | 3.18 (H $\delta$ ), 7.17 (N $\epsilon$ H)                                 |
| Leu-8   | 8.26     | 4.33       | 1.66       | 1.59       | 0.92 (H $\delta$ 1), 0.86 (H $\delta$ 2), 7.60; 7.04 (CONH <sub>2</sub> ) |

<sup>a</sup> not detected (fast exchange with water).

**Table S5.** Proton chemical shifts of peptide **3** (at 600 MHz; in H<sub>2</sub>O + D<sub>2</sub>O 95:5 + CD<sub>3</sub>COOD; pH=3.0; T = 25 deg).

| Residue | NH       | H $\alpha$ | H $\beta$  | H $\gamma$ | Others                                                                    |
|---------|----------|------------|------------|------------|---------------------------------------------------------------------------|
| Thr-1   | <i>a</i> | 3.98       | 4.31       | 1.31       |                                                                           |
| Trp-2   | 8.90     | 4.63       | 3.30       |            | 10.11 (N1H), 7.26 (H2), 7.60 (H4), 7.23 (H5), 7.14 (H6), 7.48 (H7)        |
| Xxx-3   | 8.24     | 3.93       | 1.77       | 0.96       | 1.36 (H $\delta$ ), 1.65 (H $\epsilon$ )                                  |
| Gln-4   | 7.96     | 3.82       | 2.00; 1.93 | 2.32       | 7.51; 6.86 (N $\epsilon$ H <sub>2</sub> )                                 |
| Ser-5   | 7.70     | 4.36       | 3.90; 3.85 |            |                                                                           |
| Thr-6   | 7.91     | 4.18       | 4.14       | 1.08       |                                                                           |
| Xxx-7   | 8.05     | 4.72       | 3.28; 3.20 |            | 7.74 (H $\delta$ )                                                        |
| Arg-8   | 8.20     | 4.34       | 1.89; 1.79 | 1.64       | 3.20 (H $\delta$ ), 7.20 (N $\epsilon$ H)                                 |
| Leu-9   | 8.18     | 4.31       | 1.72; 1.66 | 1.60       | 0.90 (H $\delta$ 1), 0.87 (H $\delta$ 2), 7.50; 7.04 (CONH <sub>2</sub> ) |

<sup>a</sup> not detected (fast exchange with water).

*Electronic Supplementary Material (ESI)*

**Table S6.** Proton chemical shifts of peptide **4** (at 600 MHz; in H<sub>2</sub>O + D<sub>2</sub>O 95:5 + CD<sub>3</sub>COOD; pH=3.0; T = 25 deg).

| Residue | NH       | H $\alpha$ | H $\beta$  | H $\gamma$ | Others                                                                    |
|---------|----------|------------|------------|------------|---------------------------------------------------------------------------|
| Thr-1   | <i>a</i> | 3.86       | 4.13       | 1.28       |                                                                           |
| Trp-2   | 8.84     | 4.81       | 3.30; 3.24 |            | 10.18 (N1H), 7.31 (H2), 7.72 (H4), 7.18 (H5), 7.24 (H6), 7.48 (H7)        |
| Xxx-3   | 7.81     | --         | 1.40; 1.65 | 2.01       | 1.84 (H $\delta$ ), 5.42 (H $\epsilon$ )                                  |
| Gln-4   | 7.75     | 3.93       | 1.93       | 2.30; 2.08 | 7.47; 6.83 (N $\epsilon$ H <sub>2</sub> )                                 |
| Ser-5   | 7.22     | 4.48       | 3.95; 3.74 |            |                                                                           |
| Thr-6   | 8.04     | 4.27       | 4.27       | 1.24       |                                                                           |
| Xxx-7   | 7.77     | --         | 1.30; 1.65 | 2.01       | 1.84 (H $\delta$ ), 5.32 (H $\epsilon$ )                                  |
| Arg-8   | 7.77     | 4.31       | 1.72; 1.89 | 1.59       | 3.18 (H $\delta$ ), 7.15 (N $\epsilon$ H)                                 |
| Leu-9   | <i>a</i> | 4.02       | 1.73       | 1.73       | 0.96 (H $\delta$ 1), 0.95 (H $\delta$ 2), 7.48; 6.83 (CONH <sub>2</sub> ) |

*a* not detected.

**Table S7.** Proton chemical shifts of peptide **5** (at 600 MHz; in H<sub>2</sub>O + D<sub>2</sub>O 95:5 + CD<sub>3</sub>COOD; pH=3.0; T = 25 deg).

| Residue | NH       | H $\alpha$ | H $\beta$  | H $\gamma$ | Others                                                                    |
|---------|----------|------------|------------|------------|---------------------------------------------------------------------------|
| Thr-1   | <i>a</i> | 3.89       | 4.20       | 1.30       |                                                                           |
| Trp-2   | 8.96     | 4.85       | 3.42; 3.25 |            | 10.21 (N1H), 7.36 (H2), 7.74 (H4), 7.25 (H5), 7.18 (H6), 7.50 (H7)        |
| Xxx-3   | 8.60     | --         | 1.82; 1.37 | 1.96       | 1.76 (H $\delta$ ); 5.43 (H $\epsilon$ )                                  |
| Gln-4   | 7.86     | 3.87       | 1.86; 1.70 | 2.37       | 7.14; 7.21 (N $\epsilon$ H <sub>2</sub> )                                 |
| Ser-5   | 7.94     | 4.20       | 4.03; 3.96 |            |                                                                           |
| Thr-6   | 7.44     | 4.05       | 4.22       | 1.16       |                                                                           |
| Xxx-7   | 8.03     | --         | 1.82; 1.41 | 1.96       | 1.76 (H $\delta$ ); 5.36 (H $\epsilon$ )                                  |
| Arg-8   | 7.65     | 4.16       | 1.90       | 1.69       | 3.18 (H $\delta$ ), 7.22 (N $\epsilon$ H)                                 |
| Leu-9   | 7.62     | 4.22       | 1.83; 1.76 | 1.63       | 0.96 (H $\delta$ 1), 0.88 (H $\delta$ 2), 7.45; 6.85 (CONH <sub>2</sub> ) |

*a* not detected (fast exchange with water).

**Table S8.** Proton chemical shifts of peptide **6** (at 600 MHz; in H<sub>2</sub>O + D<sub>2</sub>O 95:5 + CD<sub>3</sub>COOD; pH=3.0; T = 25 deg).

| Residue | NH       | H $\alpha$ | H $\beta$  | H $\gamma$ | Others                                                                    |
|---------|----------|------------|------------|------------|---------------------------------------------------------------------------|
| Trp-1   | <i>a</i> | 4.36       | 3.45; 3.35 | --         | 10.30 (N1H), 7.37 (H2), 7.72 (H4), 7.20 (H5), 7.28 (H6), 7.51 (H7)        |
| Xxx-2   | 7.88     | --         | 1.76; 1.41 | 1.90       | 1.61 (H $\delta$ ); 5.41 (H $\epsilon$ )                                  |
| Gln-3   | 7.88     | 4.12       | 1.95; 2.11 | 2.37       | 7.50; 6.87 (N $\epsilon$ H <sub>2</sub> )                                 |
| Ser-4   | 7.99     | 4.44       | 3.99; 3.82 |            |                                                                           |
| Thr-5   | 7.89     | <i>a</i>   | 4.22       | 1.23       |                                                                           |
| Xxx-6   | 7.86     | --         | 1.76; 1.40 | 1.90       | 1.61 (H $\delta$ ); 5.34 (H $\epsilon$ )                                  |
| Arg-7   | 7.89     | 4.30       | 1.89; 1.75 | 1.60       | 3.18 (H $\delta$ ), 7.20 (N $\epsilon$ H)                                 |
| Leu-8   | 7.99     | 4.27       | 1.72       | 1.62       | 0.93 (H $\delta$ 1), 0.86 (H $\delta$ 2), 7.44; 7.10 (CONH <sub>2</sub> ) |

*a* not detected.

Electronic Supplementary Material (ESI)

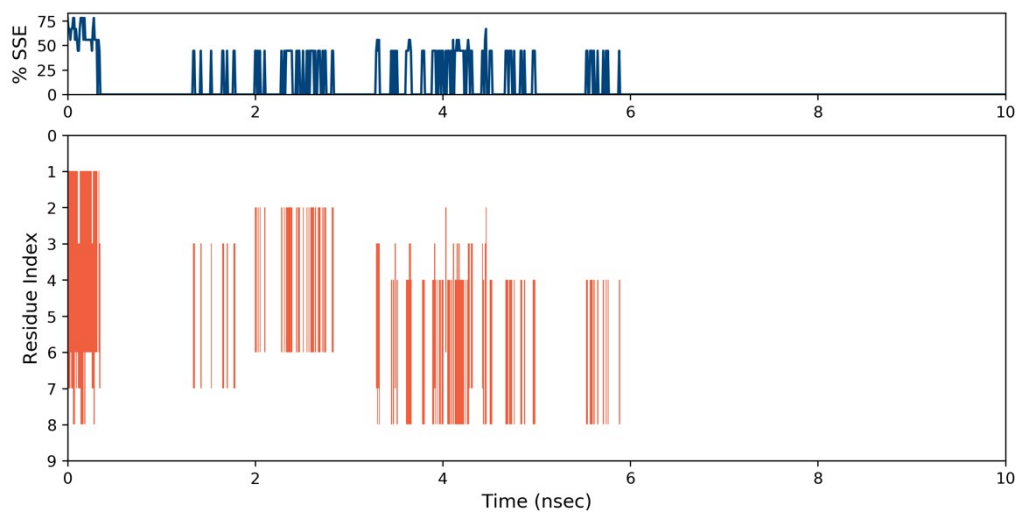

**Figure S10.** SSE ( $\alpha$ -helices) composition for peptide **1** over the time (blue), and the  $\alpha$ -helical secondary structure monitored for individual amino acid residues over the time (red).

Electronic Supplementary Material (ESI)

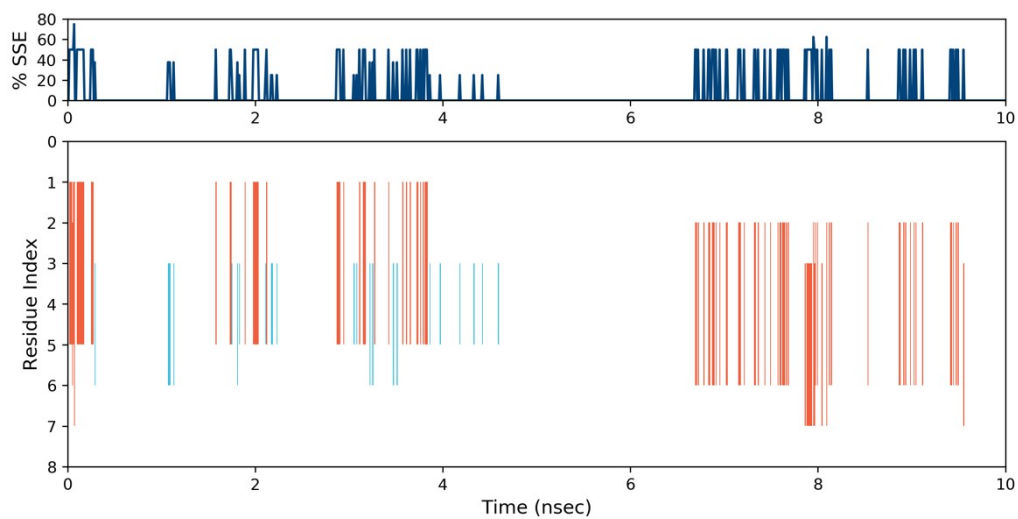

**Figure S11.** SSE ( $\alpha$ -helices) composition for peptide **2** over the time (blue), and the  $\alpha$ -helical secondary structure monitored for individual amino acid residues over the time (red).

Electronic Supplementary Material (ESI)

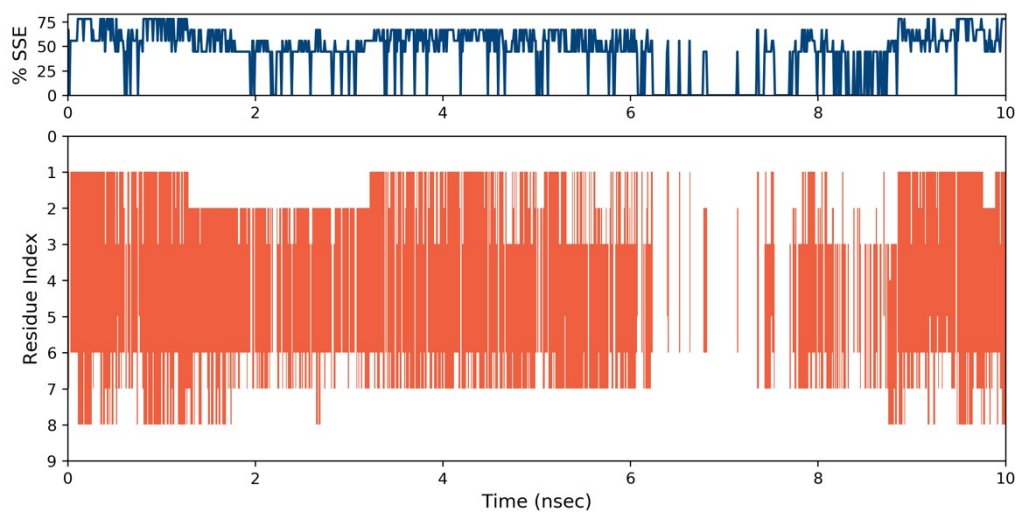

**Figure S12.** SSE ( $\alpha$ -helices) composition for peptide **3** over the time (blue), and the  $\alpha$ -helical secondary structure monitored for individual amino acid residues over the time (red).

Electronic Supplementary Material (ESI)

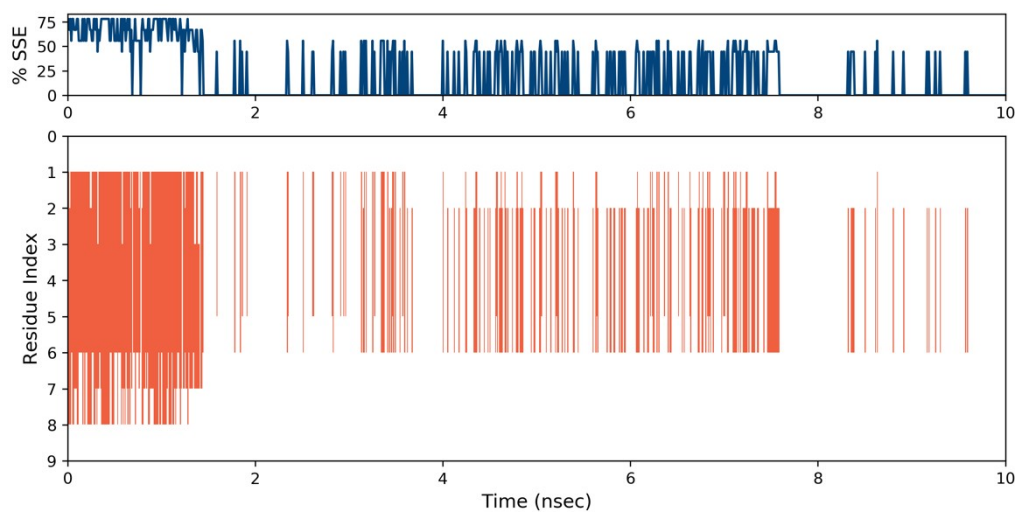

**Figure S13.** SSE ( $\alpha$ -helices) composition for peptides **4** (*trans*-isomer) over the time (blue), and the  $\alpha$ -helical secondary structure monitored for individual amino acid residues over the time (red).



Electronic Supplementary Material (ESI)

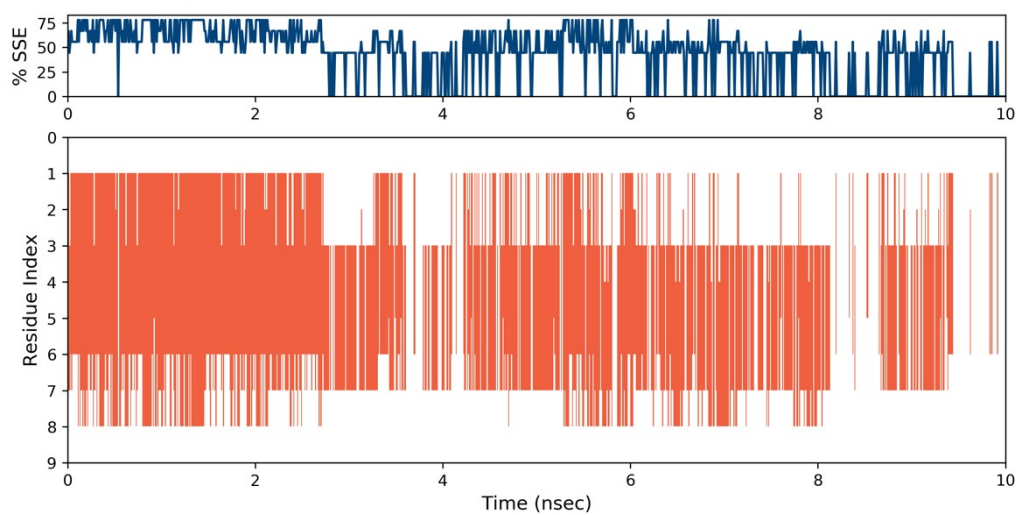

**Figure S14.** SSE ( $\alpha$ -helices) composition for peptides **5** (*cis*-isomer) over the time (blue), and the  $\alpha$ -helical secondary structure monitored for individual amino acid residues over the time (red).

Electronic Supplementary Material (ESI)

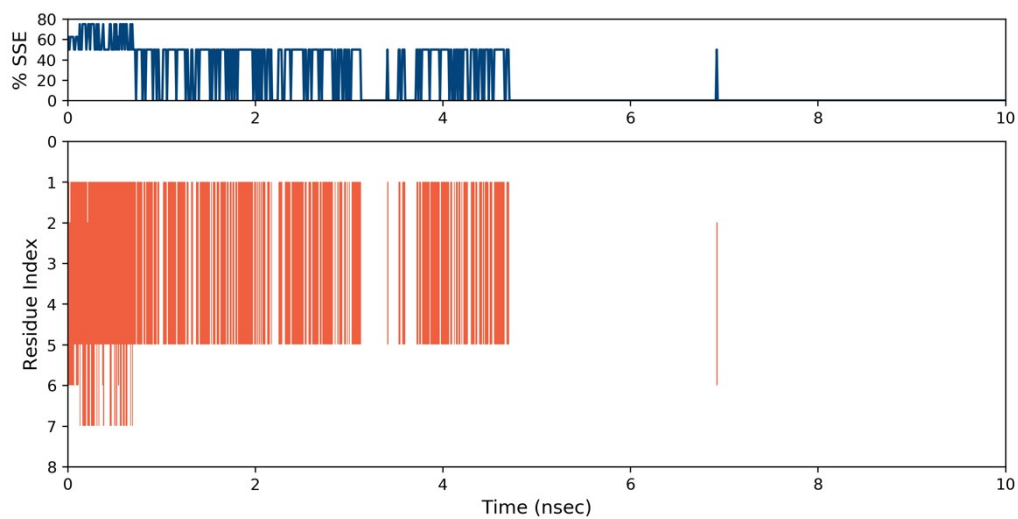

**Figure S15.** SSE ( $\alpha$ -helices) composition for peptide **6** over the time (blue), and the  $\alpha$ -helical secondary structure monitored for individual amino acid residues over the time (red).

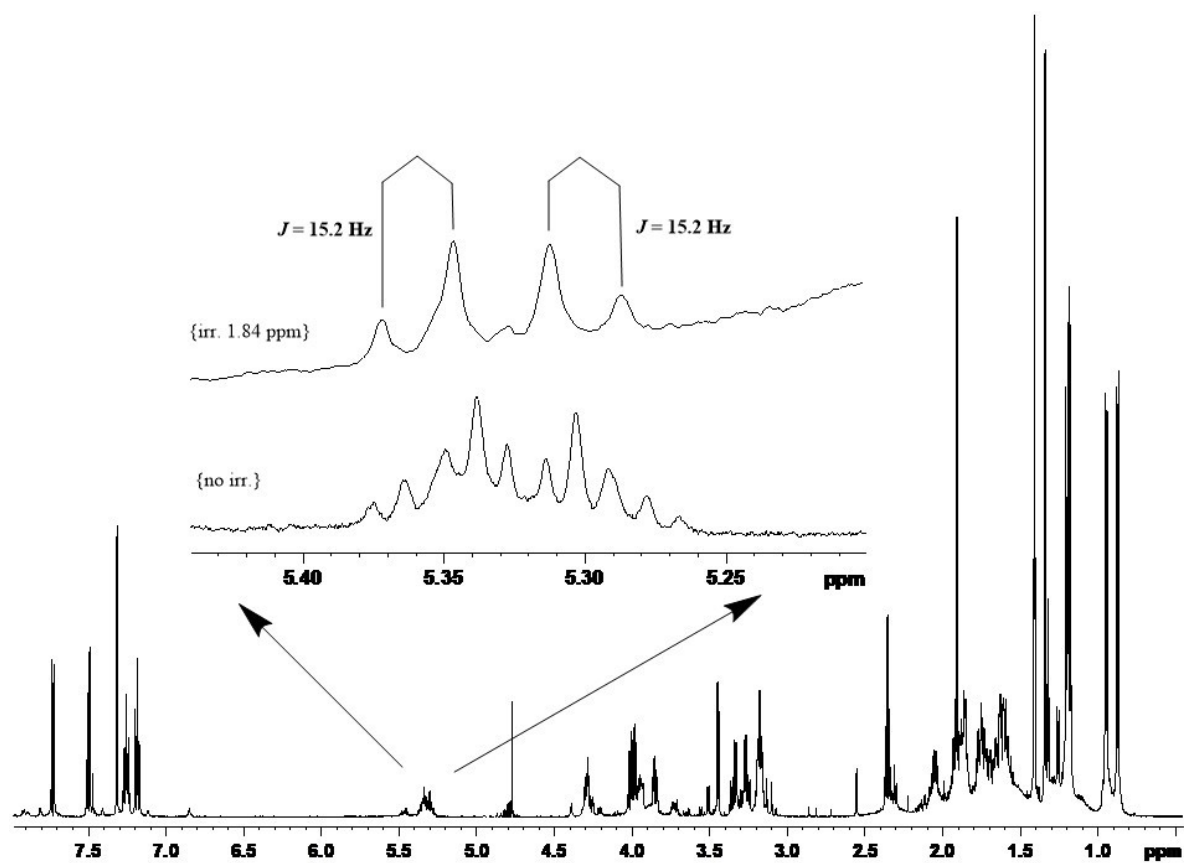

**Figure S16.** Proton NMR spectrum of peptide **4** in D<sub>2</sub>O. The signals of olefinic protons are expanded and shown also at irradiation of neighbouring CH<sub>2</sub> groups.

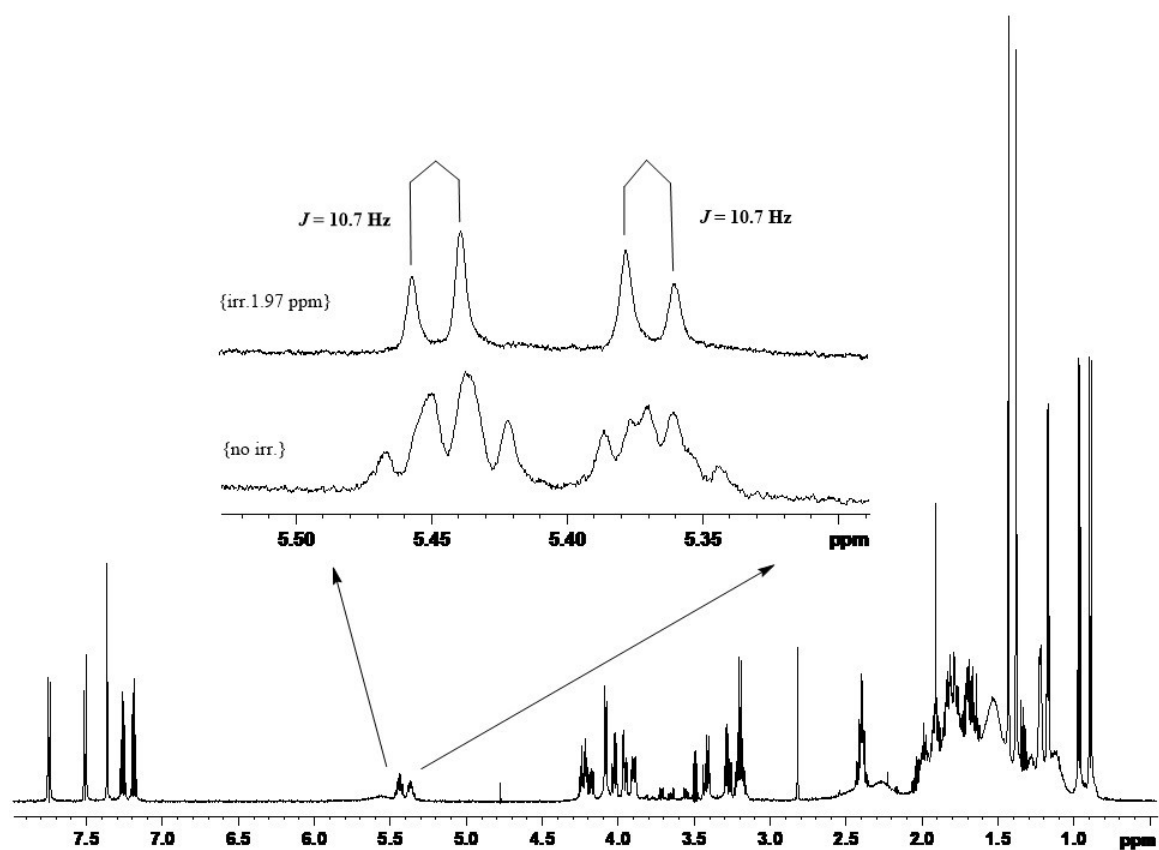

**Figure S17.** Proton NMR spectrum of peptide 5 in D<sub>2</sub>O. The signals of olefinic protons are expanded and shown also at irradiation of neighbouring CH<sub>2</sub> groups.

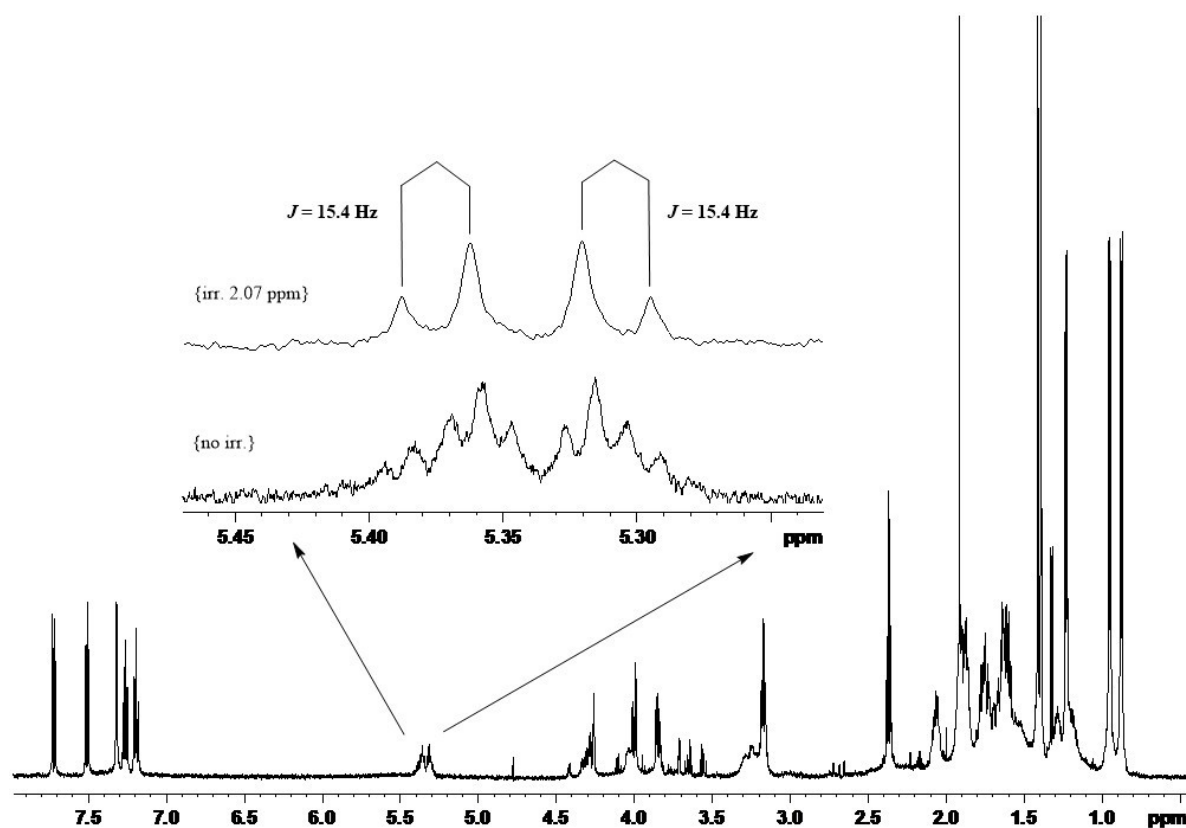

**Figure S18.** Proton NMR spectrum of peptide **6** in D<sub>2</sub>O. The signals of olefinic protons are expanded and shown also at irradiation of neighbouring CH<sub>2</sub> groups.

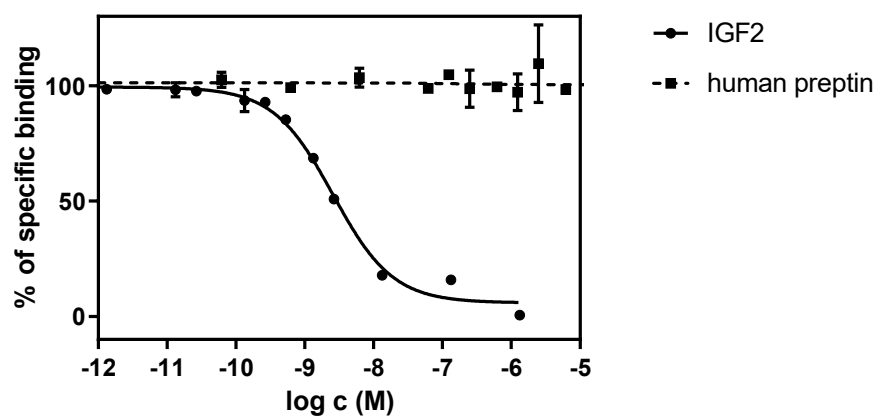

**Figure S19.** Representative binding curves of IGF2 and preptin on immobilized D11. Inhibition of binding of human [<sup>125</sup>I]-moniodotyrosyl-Tyr2-IGF2 to D11 by human IGF2 (solid line) and by human preptin (dashed line).

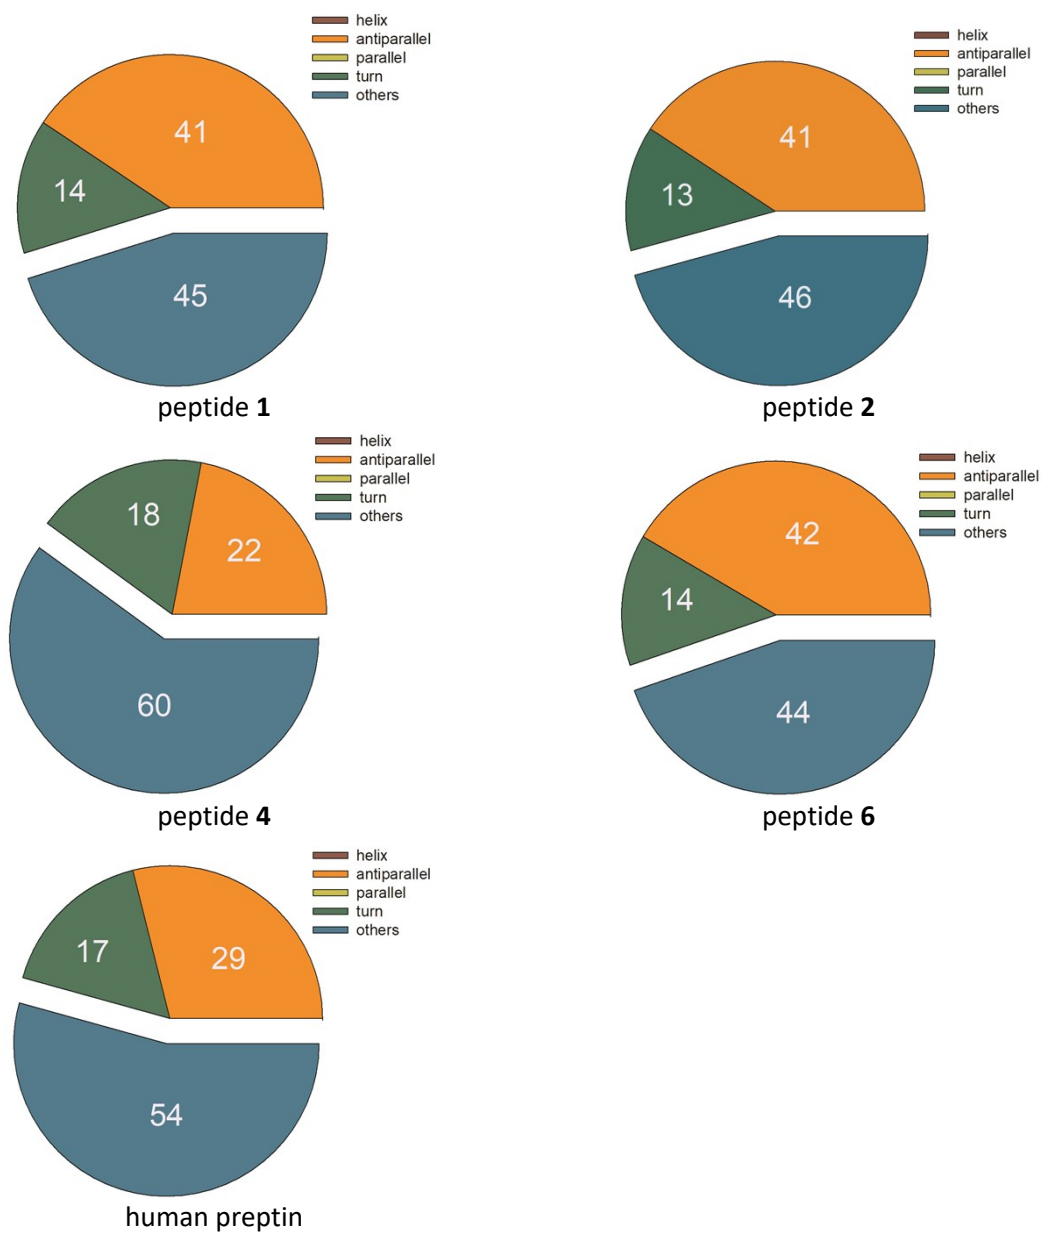

**Figure S20.** Estimated secondary structure content (%) for peptides **1**, **2**, **4**, **6** and human preptin provided by CD spectroscopy.

*Electronic Supplementary Material (ESI)*

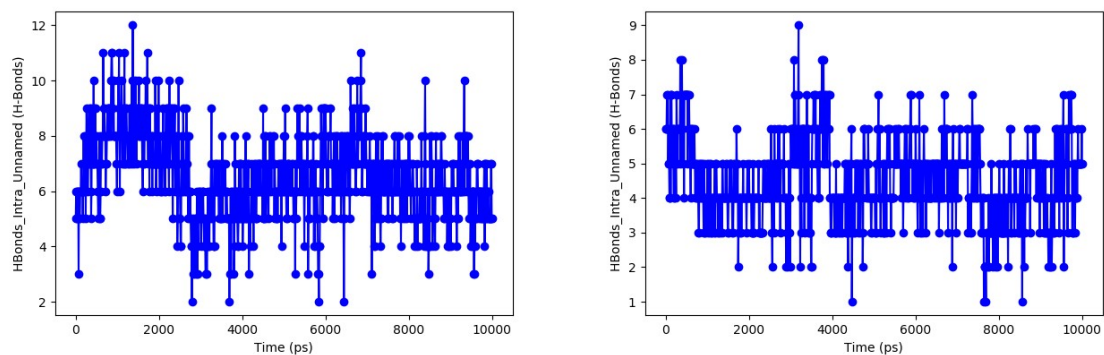

**Figure S21.** Number of intramolecular H-bonds occurring in peptide **5** (left) and peptide **6** (right) during the 10 ns MD simulation. The MD simulations performed for peptide 5, and peptide 6, revealed an average number of seven intramolecular H-bonds occurring in the former, while only five for the latter



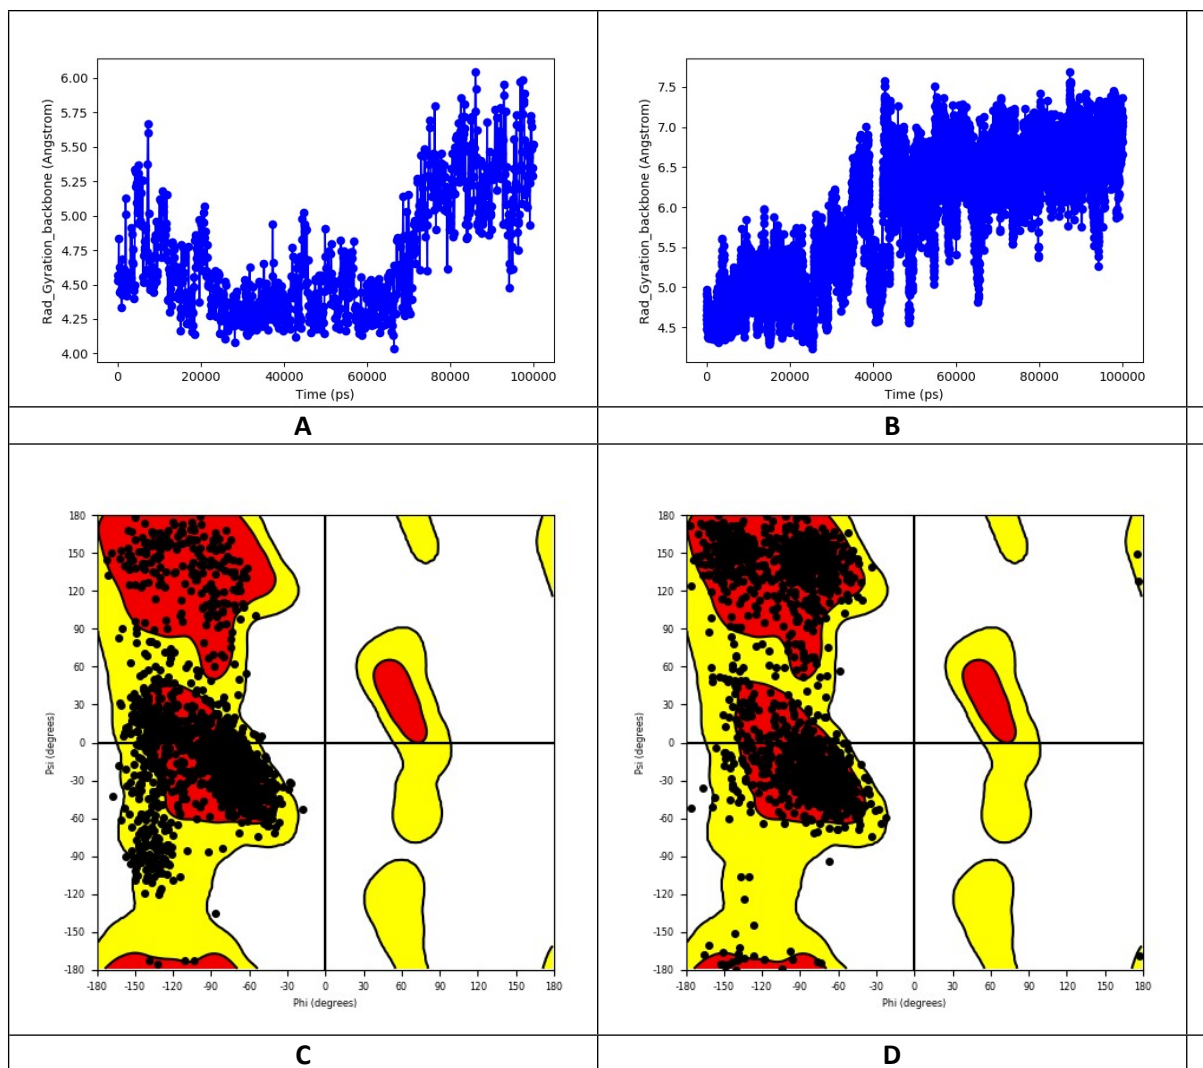

**Figure S22.** Average deviations (in Å) of backbone atoms (top row) of peptide **4** (A) and peptide **5** (B) from the reference geometry as monitored during the 100 ns MD simulation. The bottom row shows the Ramachandran plots for 200 geometries of peptide **4** (C) and peptide **5** (D) sampled during the 100 ns MD.

The figure explains slightly higher flexibility of backbone atoms of peptide **5** over peptide **4**. Although the MD run was affected by the initial helical structure, after 80 ns we can expect that the system is equilibrated. After that time, we still see higher average deviations of backbone atoms for peptide **5** (6.5 Å) than for peptide **4** (5.5 Å). Analysis of the ( $\phi$ ,  $\psi$ ) backbone torsion angles of both peptides also revealed a slight tendency of peptide **4** to adopt  $\delta_D$  conformation (ca.  $-150^\circ$ ,  $-90^\circ$ ; notation taken from Ref. {Kaminský, 2016 #4266}) that we did not observe for peptide **5** (Figure S22, ESI).

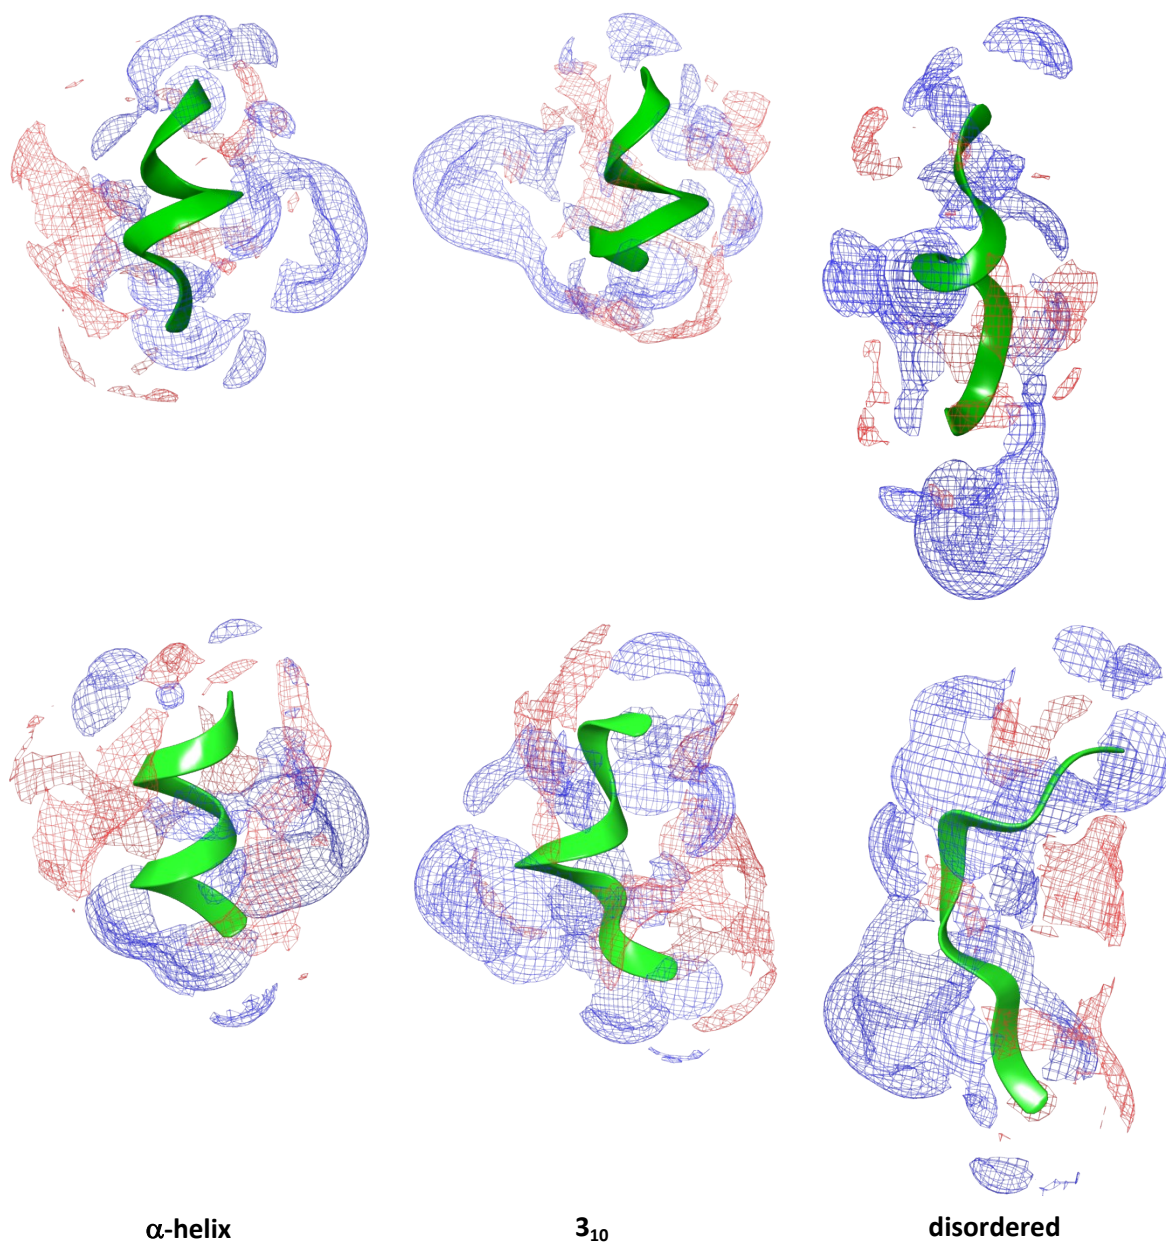

**Figure S23.** Hydrophobic (red) and hydrophilic (blue) surfaces for selected representative geometries of  $\alpha$ -helix,  $3_{10}$ -helix, and a disordered structure of peptide 4 (top) and peptide 5 (bottom).

**Table S9.** Experimental absorption and CD band wavelengths  $\lambda$  (nm) and intensities ( $\Delta\epsilon$ ).

|               | $\lambda$ (nm) | $\Delta\epsilon$ ( $M^{-1}cm^{-1}$ ) |
|---------------|----------------|--------------------------------------|
| Human preptin | 200            | -3.8                                 |
|               | 226            | -0.3                                 |
| peptide 1     | 198            | -2.6                                 |
|               | 225            | 0.1                                  |
| peptide 2     | 198            | -4.1                                 |
|               | 228            | 0.1                                  |
| peptide 3     | 189            | 3.1                                  |
|               | 207            | -2.0                                 |
|               | 225            | -1.1                                 |
| peptide 4     | 201            | -4.4                                 |
|               | 226            | -0.3                                 |
|               | 233            | -0.5                                 |
| peptide 5     | 190            | 1.9                                  |
|               | 208            | -1.4                                 |
|               | 227            | -0.8                                 |
| peptide 6     | 200            | -1.8                                 |
|               | 226            | 0.1                                  |
